# Supplementary material
Source: PubMed Central journal article supplement (PMC3397891)

## SUPPLEMENTAL MATERIAL

## SUPPLEMENTAL FIGURE LEGENDS

**SUPPLEMENTAL FIGURE 1. Adenoviral-mediated transient expression of FOXC1 increases invasion of MCF10A cells.** A, representative immunoblots demonstrating transient overexpression of FOXC1 in MCF10A cells transduced with control adenovirus (AdGFP) or adenovirus encoding FOXC1 (AdFOXC1). B, relative invasion of MCF10A cells transduced with AdGFP or AdFOXC1. C, relative migration of MCF10A cells transduced with AdGFP or AdFOXC1. D, relative transcript levels of EMT-related genes normalized to AdGFP transduced cells. *GAPDH* was used as an endogenous control. Data represent three independent experiments and are presented as mean  $\pm$  SEM. \*,  $P < 0.05$ .

**SUPPLEMENTAL FIGURE 2. Transient expression of FOXC1 increases invasion of MCF12A cells.** A, representative immunoblots demonstrating transient overexpression of FOXC1 in MCF12A cells transfected with empty vector (pcDNA) or vector encoding FOXC1 (FOXC1). B, relative invasion of MCF12A cells transduced with AdGFP as control or AdFOXC1. C, relative migration of MCF12A cells transduced with AdGFP as control or AdFOXC1. D, relative transcript levels of EMT-associated genes normalized to cells transduced with AdGFP with *GAPDH* used as an endogenous control. Data represent three independent experiments and are presented as mean  $\pm$  SEM. \*,  $P < 0.05$ .

**SUPPLEMENTAL FIGURE 3. Transient overexpression of FOXC1 by viral transduction slows the growth MCF10A cells and has no significant effect on MCF12A growth.** Graphs illustrate the number of viable MCF10A (A) or MCF12A (B) cells at 24, 48, 72, 96, 120, or 144 hours post-transduction with control adenovirus (AdGFP) or FOXC1 encoding virus (AdFOXC1). Data summarize three independent experiments. Error bars represent SD. \*,  $P < 0.05$ ; \*\*,  $P < 0.01$ .

**SUPPLEMENTAL FIGURE 4. Expression of FOXC1 positively correlates with MMP7 expression in breast cancers and breast cancer cell lines.** Log<sub>2</sub> transformed, median centered data from Ivshina (A), Charaffe (B) and Neve (C) data sets were plotted by *FOXCI* (x-axis) and *MMP7* (y-axis). Data from Scheutz 2 (A) was colored coded according to estrogen receptor (ER) status. D, representative western blots demonstrating FOXC1 (Cell Signaling, #7415) and MMP7 (R&D Systems, AF907) protein expression in a number of breast cancer and non-transformed mammary epithelial cell lines.  $P$  values less than 0.05 were considered statistically significant.

**SUPPLEMENTAL FIGURE 5. Transient overexpression of FOXC1 in MCF10A or MCF12A cells results in increased expression of MMP7.** A, conditioned media from MCF12A cells transfected with empty pcDNA vector or vector encoding FOXC1 was used in an ELISA for MMP7. The bar graph summarizes the mean  $\pm$  SD for three independent experiments. Transcript levels of *MMP7*, *MMP2* and *MMP9* in MCF10A (B) or MCF12A (C) cells transduced with control adenovirus (AdGFP) or adenovirus encoding FOXC1 (AdFOXC1). Data are relative to the respective AdGFP transduced control cells; *GAPDH* was used as endogenous control. Data summarize three independent experiments and are presented as mean  $\pm$  SD. D, levels of *FOXCI* (light grey) or *MMP7* (dark grey) transcripts in MCF10A (left panel) or MCF12A (right panel) cells transduced with the indicated multiplicity of infection (MOI) of FOXC1 adenovirus relative to untreated cells (0 MOI). *GAPDH* was used as endogenous control. \*,  $P < 0.05$ .

**SUPPLEMENTAL FIGURE 6. Silencing of FOXC1 in basal-like breast cancer cell lines results in decreased expression of MMP7.** A, *FOXCI* and *MMP7* expression in HCC1187 cells 72h post-transduction with lentivirus encoding control shRNA targeted to luciferase (shluc) or three different shRNAs targeted to FOXC1 (shFOXC1#2, shFOXC1#3, shFOXC1#4). Data summarize three independent experiments and are presented as mean  $\pm$  SE. B and C, *FOXCI* and *MMP7* expression in HCC1143 (B) or MDA468 (C) cells 72h post-transduction with lentivirus encoding shRNA targeted to

luciferase (shluc) or FOXC1 (shFOXC1#3, shFOXC1#4). Data are the mean value of triplicate wells from a single experiment. D, *FOXC1* and *MMP7* expression in MDA-MB-468 cells stably expressing shRNAs to luciferase (shluc) or FOXC1 (shFOXC1#3, shFOXC1#4). Cells were selected with puromycin for at least two weeks. RNA was harvest in triplicate from three sequential passages of each cell line. Data are presented as mean +/- SE. \*,  $P < 0.01$ . \*\*,  $P < 0.05$ . †,  $P = 0.053$ .

**SUPPLEMENTAL FIGURE 7. Associations between *FOXC1* or *MMP7* expression and overall survival in the Sorlie *et al.* and van de Vijver *et al.* data sets.** Kaplan-Meier curves of overall survival using data from the Sorlie *et al.* (A and B) or van de Vijver *et al.* (C and D) data sets. Samples were stratified by high (upper quartile) or low (lower three quartiles) expression of *FOXC1* (A and C) or *MMP7* (B and D).  $P$  values less than 0.05 were considered statistically significant.

Supplemental Table 1.

Supplemental Table 1. Gene expression array studies used for co-regulation analysis

| Study        | Reporter ID<br>FOXC1 | Reporter ID<br>MMP7 | Correlation<br>Coefficient | Affymetrix Array Type            | Sample n | Reference                                                | GEO or EMBL-EBI<br>Identifier |
|--------------|----------------------|---------------------|----------------------------|----------------------------------|----------|----------------------------------------------------------|-------------------------------|
| Bittner      | 213260_at            | 204259_at           | 0.025999963                | Human Genome U133 plus 2.0 array | 336      | Not Published. 2005/01/15                                | GSE2109                       |
| Boersma      | 213260_at            | 204259_at           | -0.037098527               | Human Genome U133A array         | 95       | <i>Int J Cancer</i> . 2008 Mar 15;122(6):1324-32         | GSE5847                       |
| Chin         | 213260_at            | 204259_at           | 0.70725274                 | Human Genome U133A array         | 118      | <i>Cancer Cell</i> . 2006 Dec;10(6):529-41.              | E-TA-BM-158                   |
| Desmedt      | 213260_at            | 204259_at           | 0.45048435                 | Human Genome U133A array         | 198      | <i>Clin Cancer Res</i> . 2007 Jun 1;13(11):3207-14.      | GSE7390                       |
| Farmer       | 213260_at            | 204259_at           | 0.40217435                 | Human Genome U133A array         | 49       | <i>Oncogene</i> . 2005 Jul 7;24(29):4660-71.             | GSE1561                       |
| Ginestier    | 213260_at            | 204259_at           | 0.6364306                  | Human Genome U133 Plus 2.0 array | 55       | <i>Clin Cancer Res</i> . 2006 Aug 1;12(15):4533-44.      | -                             |
| Hess         | 213260_at            | 204259_at           | 0.59545517                 | Human Genome U133A array         | 133      | <i>J Clin Oncol</i> . 2006 Sep 10;24(26):4236-44         | -                             |
| Hoefflich    | 213260_at            | 204259_at           | 0.47088987                 | Human Genome U133 Plus 2.0 array | 30       | <i>Clin Cancer Res</i> . 2009 Jul 15;15(14):4549-54.     | GSE12763                      |
| Ishina       | 213260_at            | 204259_at           | 0.6259974                  | Human Genome U133A array         | 289      | <i>Cancer Res</i> . 2006 Nov 1;66(21):10292-301          | GSE4922                       |
| Landemaine   | 213260_at            | 204259_at           | 0.2504087                  | Human Genome U133 Plus 2.0 array | 23       | <i>Cancer Res</i> . 2008 Aug 1;68(15):6092-9.            | GSE11078                      |
| Lu           | 213260_at            | 204259_at           | 0.3724028                  | Human Genome U133 Plus 2.0 array | 129      | <i>Breast Cancer Res Treat</i> . 2008 Mar;108(2):191-201 | GSE5460                       |
| Minn 2       | 213260_at            | 204259_at           | 0.4808463                  | Human Genome U133A array         | 121      | <i>Nature</i> . 2005 Jul 28;436(7050):518-24.            | GSE2603                       |
| Poola        | 213260_at            | 204259_at           | 0.51770705                 | Human Genome U133A array         | 8        | <i>Nat Med</i> . 2005 May;11(5):481-3. Epub 2005 May 1.  | GSE2429                       |
| Richardson 2 | 213260_at            | 204259_at           | 0.06784946                 | Human Genome U133 Plus 2.0 array | 47       | <i>Cancer Cell</i> . 2006 Feb;9(2):121-32.               | GSE3744                       |
| Schmidt      | 213260_at            | 204259_at           | 0.41970545                 | Human Genome U133A array         | 200      | <i>Cancer Res</i> . 2008 Jul 1;68(13):5405-13.           | GSE11121                      |
| Schuetz      | 213260_at            | 204259_at           | 0.40949553                 | Human Genome U133A Array         | 10       | <i>Cancer Res</i> . 2006 May 15;66(10):5278-86           | GSE3893                       |
| Schuetz 2    | 213260_at            | 204259_at           | 0.79221195                 | Human Genome U133 Plus 2.0 array | 14       | <i>Cancer Res</i> . 2006 May 15;66(10):5278-86.          | GSE3893                       |
| Sotiriou 3   | 213260_at            | 204259_at           | 0.3348717                  | Human Genome U133A array         | 189      | <i>J Natl Cancer Inst</i> . 2006 Feb 15;98(4):262-72     | GSE2990                       |
| Turashvili   | 213260_at            | 204259_at           | 0.1501221                  | Human Genome U133 Plus 2.0 array | 30       | <i>BMC Cancer</i> . 2007 Mar 27;7:55.                    | GSE3764                       |
| Wang         | 213260_at            | 204259_at           | 0.60408466                 | Human Genome U133A array         | 286      | <i>Lancet</i> . 2005 Feb 19;365(9460):571-9.             | GSE2034                       |

Supplemental Table 2.

Supplemental Table 2 Co-regulation analysis of FOXC1 expression and expression of MMP and TIMP family members

| Data Set   | Pearson Correlation Coefficient |       |       |       |       |       |       |       |       |       |       |       |       |       |       |       |       |       |       |       |       |       |       |       |       |  |  |  |
|------------|---------------------------------|-------|-------|-------|-------|-------|-------|-------|-------|-------|-------|-------|-------|-------|-------|-------|-------|-------|-------|-------|-------|-------|-------|-------|-------|--|--|--|
|            | MMP7                            | MMP2  | MMP9  | MMP1  | MMP10 | MMP11 | MMP12 | MMP13 | MMP14 | MMP15 | MMP16 | MMP17 | MMP19 | MMP20 | MMP21 | MMP24 | MMP26 | MMP27 | MMP28 | MMP3  | MMP8  | TIMP1 | TIMP2 | TIMP3 | TIMP4 |  |  |  |
| Boersma    | -0.04                           | -0.04 | -0.04 | -0.04 | -0.04 | -0.04 | -0.04 | -0.04 | ND    | 0.21  | -0.04 | ND    | -0.04 | ND    | -0.04 | ND    | ND    | ND    | -0.04 | -0.04 | ND    | -0.07 | -0.04 | -0.04 | -0.04 |  |  |  |
| Bittner    | 0.03                            | ND    | 0.03  | 0.03  | -0.04 | 0.03  | -0.04 | -0.04 | -0.04 | 0.03  | ND    | ND    | ND    | 0.10  | -0.04 | ND    | ND    | ND    | -0.04 | 0.03  | ND    | ND    | ND    | ND    | -0.04 |  |  |  |
| Richardso  | 0.07                            | -0.09 | 0.07  | -0.09 | -0.09 | 0.07  | -0.09 | -0.09 | -0.09 | 0.07  | -0.09 | ND    | ND    | 0.07  | ND    | ND    | ND    | ND    | ND    | -0.09 | ND    | ND    | -0.09 | -0.09 | -0.09 |  |  |  |
| Turashvili | 0.15                            | ND    | ND    | -0.03 | ND    | -0.03 | ND    | -0.03 | ND    | -0.03 |  |  |  |
| Landemai   | 0.25                            | 0.55  | -0.08 | 0.25  | ND    | -0.08 | -0.08 | -0.08 | ND    | ND    | -0.08 | ND    | -0.08 | ND    | ND    | ND    | ND    | ND    | ND    | 0.07  | -0.08 | -0.08 | 0.10  | -0.08 | -0.08 |  |  |  |
| Sotiriou 3 | 0.33                            | 0.02  | 0.03  | 0.10  | 0.02  | 0.02  | 0.03  | 0.02  | -0.22 | ND    | 0.02  | ND    | -0.22 | ND    | 0.03  | ND    | 0.02  | 0.02  |  |  |  |
| Lu         | 0.37                            | 0.00  | ND    | 0.16  | -0.02 | 0.00  | 0.16  | -0.02 | ND    | ND    | 0.00  | ND    | ND    | 0.00  | ND    | ND    | ND    | ND    | ND    | -0.02 | ND    | ND    | ND    | ND    | -0.02 |  |  |  |
| Farmer     | 0.40                            | -0.03 | 0.06  | 0.06  | 0.06  | -0.03 | 0.06  | -0.03 | 0.13  | ND    | 0.03  | ND    | ND    | 0.38  | ND    | ND    | ND    | ND    | ND    | -0.03 | ND    | 0.06  | 0.06  | -0.03 | -0.03 |  |  |  |
| Schuetz    | 0.41                            | -0.06 | -0.19 | -0.06 | -0.06 | -0.06 | -0.19 | -0.06 | ND    | -0.19 | ND    | -0.06 | ND    | -0.19 | -0.06 | -0.19 | -0.06 |  |  |  |
| Schmidt    | 0.42                            | -0.02 | 0.07  | 0.07  | -0.02 | -0.02 | 0.07  | -0.02 | -0.02 | 0.01  | -0.01 | -0.01 | -0.02 | -0.01 | ND    | -0.01 | -0.01 | ND    | -0.02 | -0.01 | ND    | -0.02 | -0.02 | -0.02 | -0.02 |  |  |  |
| Desmedt    | 0.45                            | -0.02 | 0.06  | 0.07  | -0.02 | 0.00  | 0.07  | -0.02 | -0.02 | 0.01  | 0.00  | 0.00  | -0.02 | 0.00  | ND    | -0.02 | 0.00  | 0.00  | 0.00  | -0.02 | 0.00  | ND    | 0.06  | -0.02 | -0.02 |  |  |  |
| Hoeflich   | 0.47                            | 0.15  | 0.15  | 0.15  | -0.10 | 0.15  | 0.07  | 0.15  | 0.15  | 0.23  | 0.10  | ND    | ND    | 0.31  | ND    | ND    | ND    | ND    | ND    | 0.15  | ND    | 0.15  | 0.15  | 0.15  | 0.15  |  |  |  |
| Minn 2     | 0.48                            | 0.09  | 0.09  | -0.11 | 0.09  | 0.09  | 0.06  | 0.09  | -0.11 | 0.09  | 0.01  | 0.09  | 0.09  | 0.09  | ND    | -0.11 | ND    | ND    | ND    | 0.06  | ND    | 0.06  | 0.06  | -0.11 | -0.11 |  |  |  |
| Poola      | 0.52                            | -0.13 | -0.13 | -0.13 | 0.00  | 0.52  | -0.13 | -0.13 | -0.13 | -0.13 | -0.13 | -0.13 | -0.13 | 0.16  | ND    | 0.00  | -0.13 | ND    | 0.06  | -0.13 | -0.13 | -0.13 | -0.13 | -0.13 | -0.11 |  |  |  |
| Hess       | 0.60                            | 0.07  | 0.11  | 0.02  | 0.02  | 0.07  | 0.11  | ND    | -0.19 | ND    | 0.02  | 0.02  | -0.19 | ND    | 0.02  | 0.00  | 0.02  | 0.07  | 0.07  |  |  |  |
| Wang       | 0.60                            | 0.01  | 0.05  | 0.01  | 0.01  | 0.02  | 0.05  | 0.01  | 0.01  | -0.03 | 0.06  | -0.03 | 0.01  | -0.03 | ND    | -0.03 | ND    | ND    | ND    | -0.03 | ND    | ND    | 0.01  | 0.01  | 0.01  |  |  |  |
| Ivshina    | 0.63                            | 0.02  | 0.03  | 0.03  | 0.02  | 0.02  | 0.03  | 0.02  | 0.02  | -0.03 | 0.02  | -0.03 | 0.02  | -0.03 | ND    | ND    | ND    | ND    | 0.02  | -0.03 | ND    | 0.03  | 0.02  | 0.02  | 0.02  |  |  |  |
| Ginestier  | 0.64                            | -0.07 | 0.06  | 0.37  | -0.07 | -0.07 | 0.37  | -0.07 | 0.19  | ND    | -0.07 | ND    | -0.07 | ND    | -0.07 | -0.07 | ND    | ND    |  |  |  |
| Chin       | 0.71                            | -0.04 | 0.10  | 0.10  | -0.04 | -0.04 | 0.10  | -0.04 | -0.04 | -0.04 | -0.04 | ND    | -0.04 | ND    | -0.04 | ND    | ND    | ND    | 0.10  | ND    | -0.04 | -0.04 | -0.04 | -0.04 | -0.04 |  |  |  |
| Schuetz 2  | 0.79                            | 0.00  | -0.09 | 0.11  | -0.09 | 0.00  | -0.09 | 0.00  | ND    | ND    | 0.00  | ND    | 0.00  | ND    | ND    | 0.00  | 0.00  | 0.00  | 0.00  |  |  |  |
| P value    | <b>0.0001</b>                   | 0.954 | 0.956 | 0.443 | NS    |  |  |  |

ND = no data  
NS = not significant at P < 0.05

**Supplemental Table 3.**

**Supplemental Table 3** High combined expression of *FOXC1* and *MMP7* is an independent predictor of poor patient outcome in the van de Vijver *et al.* data set

**Univariate Analysis**

| Variable                          | P value | Hazard Ratio | 95% Confidence Interval |        |
|-----------------------------------|---------|--------------|-------------------------|--------|
|                                   |         |              | Lower                   | Upper  |
| High <i>FOXC1</i>                 | 0.0667  | 1.7393       | 1.1477                  | 2.3308 |
| High <i>MMP7</i>                  | 0.2924  | 1.3880       | 0.7777                  | 1.9984 |
| High <i>FOXC1</i> and <i>MMP7</i> | 0.0020  | 2.6674       | 2.0448                  | 3.2901 |
| N Stage                           | 0.2840  | 0.7307       | 0.1569                  | 1.3046 |

**Multivariate Analysis**

| Variable                          | P value | Hazard Ratio | 95% Confidence Interval |        |
|-----------------------------------|---------|--------------|-------------------------|--------|
|                                   |         |              | Lower                   | Upper  |
| High <i>FOXC1</i> and <i>MMP7</i> | 0.0020  | 2.6674       | 2.0448                  | 3.2901 |

Supplemental Figure 1.

A.

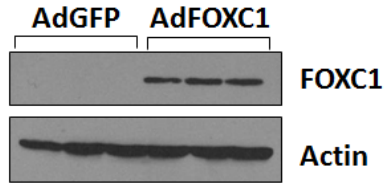

B.

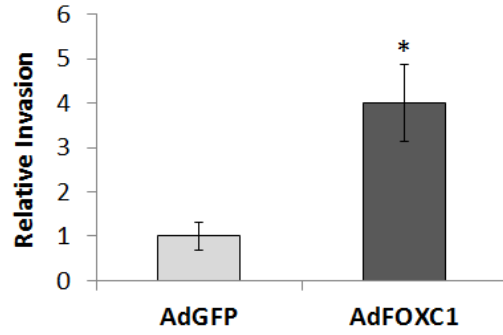

C.

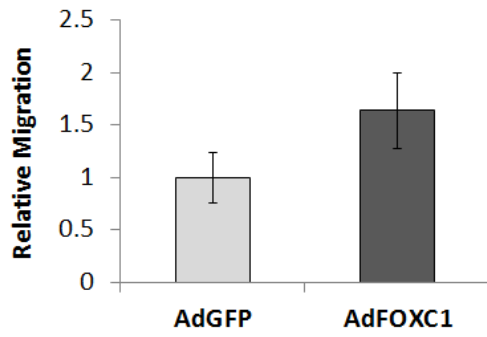

D.

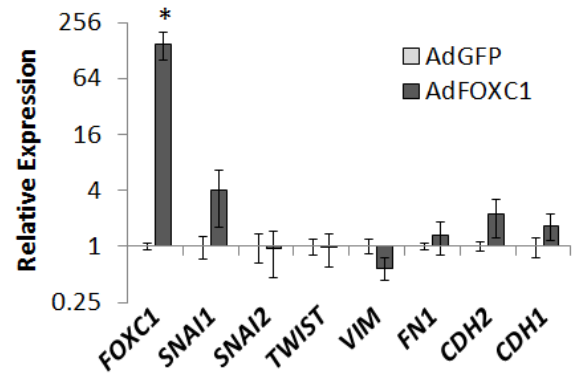

Supplemental Figure 2.

A.

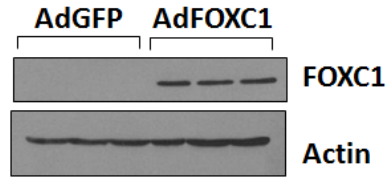

B.

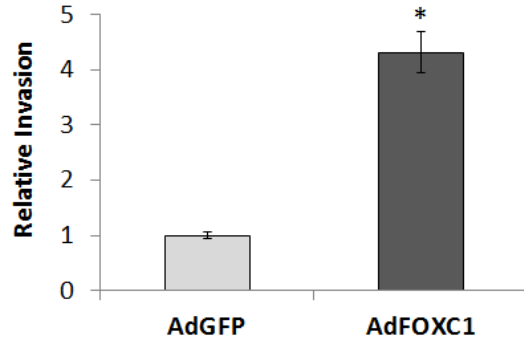

C.

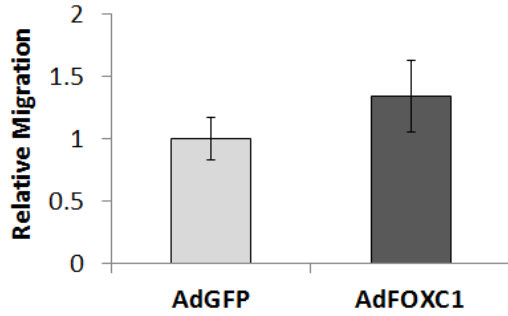

D.

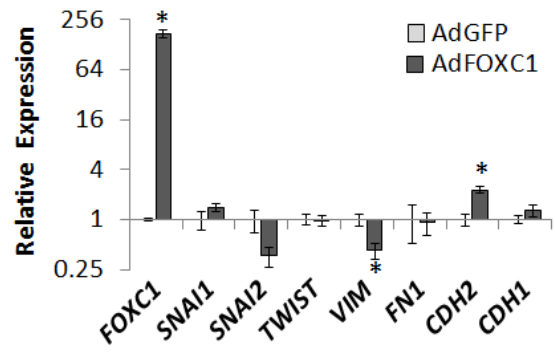

Supplemental Figure 3.

A.

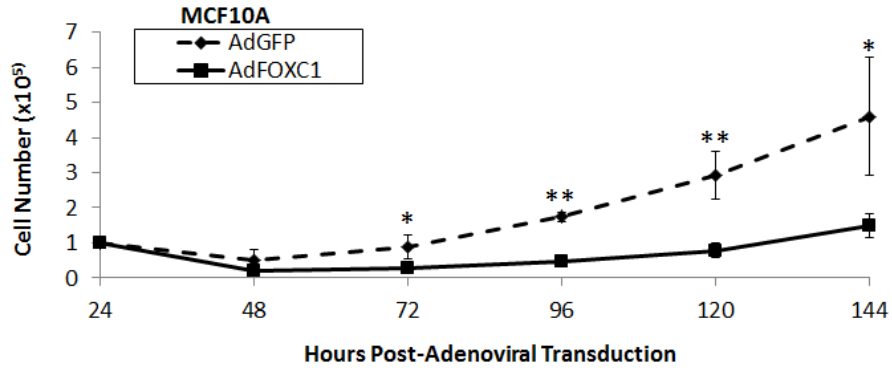

B.

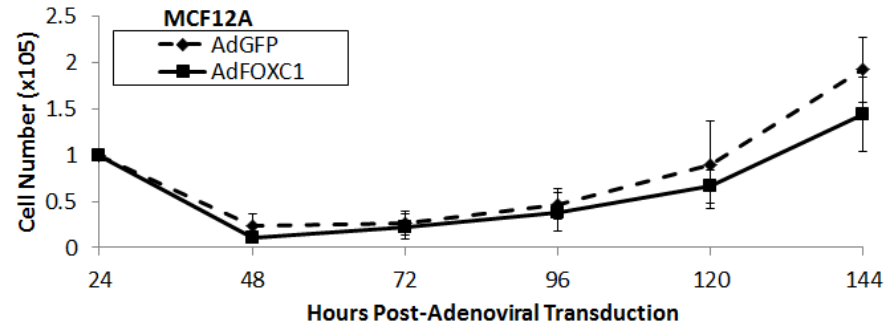



Supplemental Figure 4.

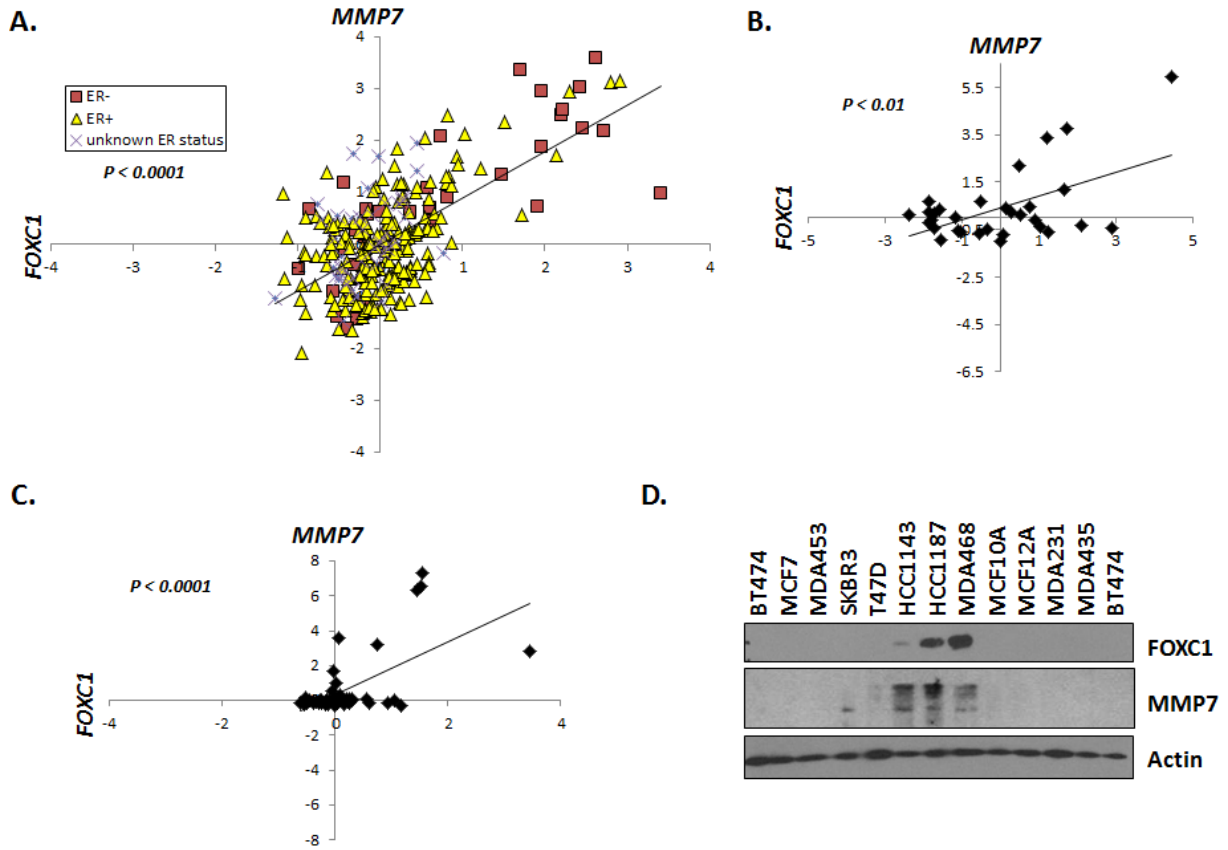

Supplemental Figure 5.

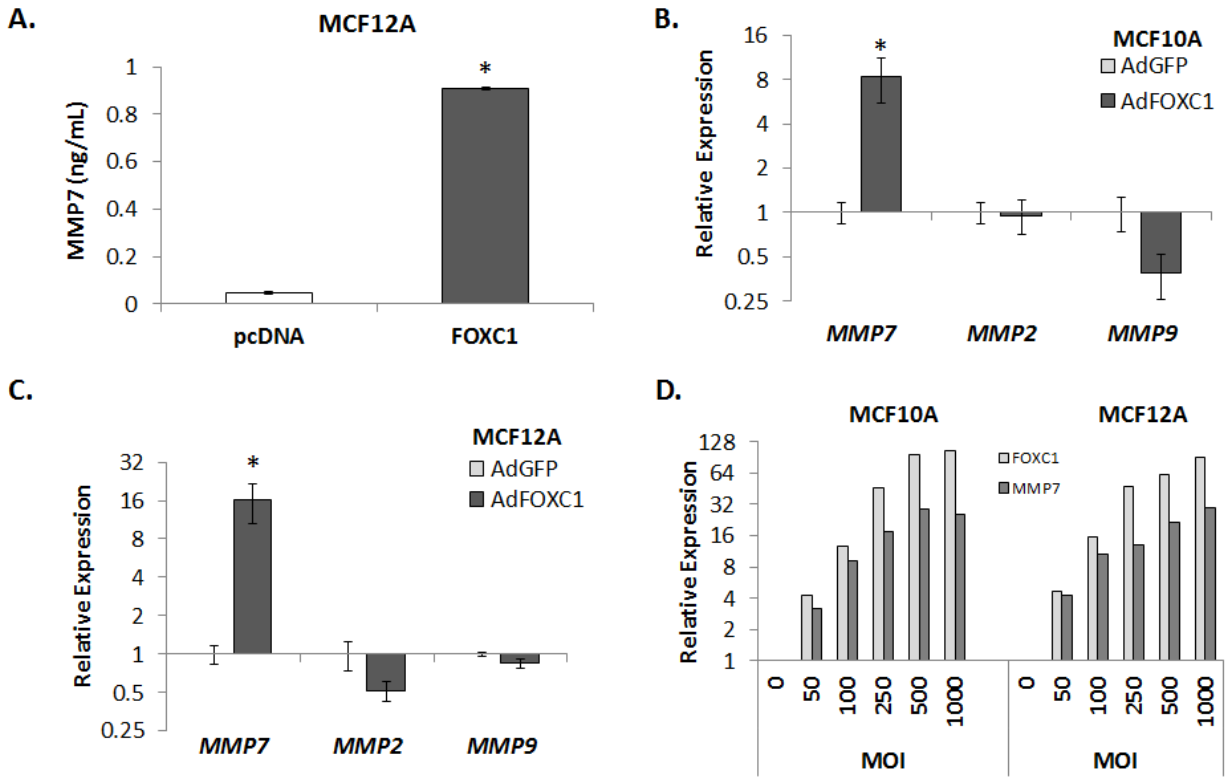

Supplemental Figure 6.

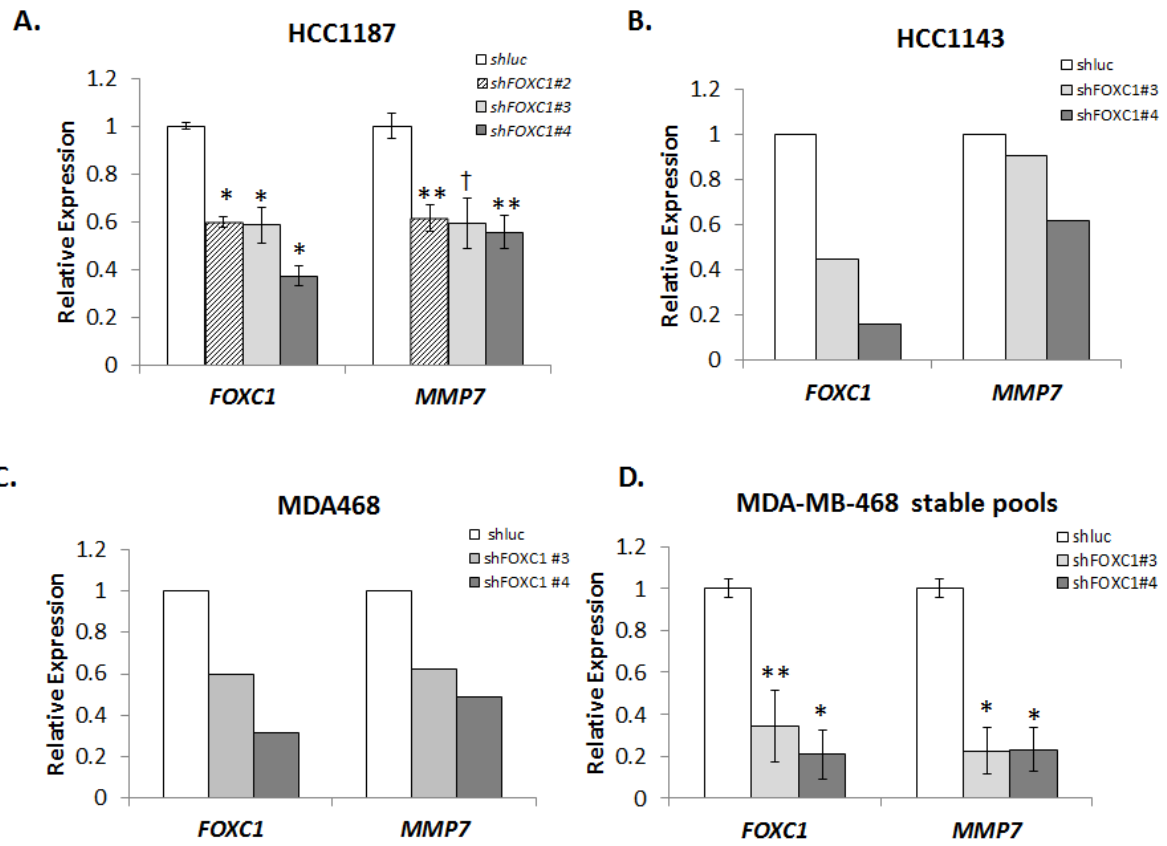

Supplemental Figure 7.

A.

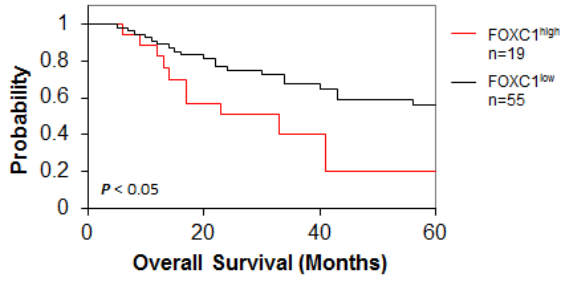

B.

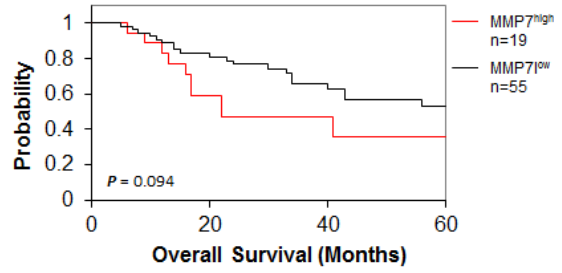

C.

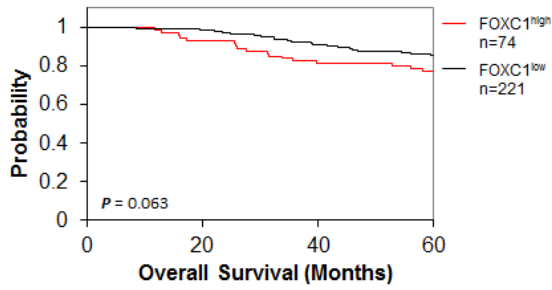

D.

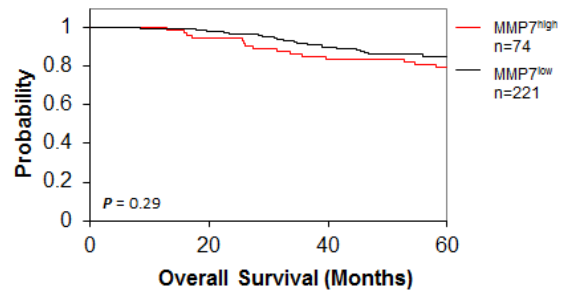

Supplement: supp_M112.375865_jbc.M112.375865-1.pdf [file supp_M112.375865_jbc.M112.375865-1.pdf]
